# Supplementary material
Source: HighWire-hosted journal article supplement (http://www.qdcxjkg.com/highwire/filestream/113039/field_highwire_adjunct_files/0/Results_FEFxFVC.pdf)
Supplement: Results_FEFxFVC.pdf [file Results_FEFxFVC.pdf]

Supplemental Table: Interactions of *HMOX1* and *GST* polymorphisms and decline in PM10 on the change in the product of **FVC \* FEF<sub>25-75</sub>** in the whole study population

| Gene Polymorphism                                       |                                      |          | Effect of a 10µg/m <sup>3</sup> decrease in PM10 over 10.92 years (mean follow-up) on change in the product of FEF <sub>25-75</sub> * FVC (L <sup>2</sup> /s) <sup>1</sup> |                         |        |
|---------------------------------------------------------|--------------------------------------|----------|----------------------------------------------------------------------------------------------------------------------------------------------------------------------------|-------------------------|--------|
|                                                         |                                      |          | Estimate                                                                                                                                                                   | 95%-confidence interval |        |
| <b>Heme Oxygenase-1 Single Nucleotide Polymorphisms</b> |                                      |          |                                                                                                                                                                            |                         |        |
|                                                         | <i>allele</i>                        | <i>N</i> |                                                                                                                                                                            |                         |        |
| <b>HMOX rs2071746</b>                                   | AA                                   | 1401     | 0.8                                                                                                                                                                        | 0.3                     | to 1.3 |
|                                                         | AT                                   | 2089     | 0.9                                                                                                                                                                        | 0.4                     | to 1.4 |
|                                                         | TT                                   | 763      | 0.8                                                                                                                                                                        | 0.1                     | to 1.4 |
| <b>HMOX rs735266</b>                                    | AA                                   | 1669     | 0.6                                                                                                                                                                        | 0.1                     | to 1.1 |
|                                                         | AT                                   | 2022     | 1.0                                                                                                                                                                        | 0.5                     | to 1.6 |
|                                                         | TT                                   | 595      | 0.7                                                                                                                                                                        | -0.1                    | to 1.5 |
| <b>HMOX rs5995098</b>                                   | CC                                   | 2021     | 0.6                                                                                                                                                                        | 0.2                     | to 1.1 |
|                                                         | CG                                   | 1876     | 1.1                                                                                                                                                                        | 0.6                     | to 1.6 |
|                                                         | GG                                   | 427      | 0.7                                                                                                                                                                        | -0.2                    | to 1.6 |
| <b>Heme Oxygenase-1 Haplotypes<sup>2</sup></b>          |                                      |          |                                                                                                                                                                            |                         |        |
|                                                         | <i>No of alleles</i>                 | <i>N</i> |                                                                                                                                                                            |                         |        |
| <b>Haplotype 1 (AAC)</b>                                | 0                                    | 798      | 0.8                                                                                                                                                                        | 0.1                     | to 1.4 |
|                                                         | 1                                    | 2178     | 0.9                                                                                                                                                                        | 0.4                     | to 1.4 |
|                                                         | 2                                    | 1389     | 0.7                                                                                                                                                                        | 0.2                     | to 1.3 |
| <b>Haplotype 3 (ATC)</b>                                | 0                                    | 3925     | 0.9 <sup>a</sup>                                                                                                                                                           | 0.5                     | to 1.3 |
|                                                         | 1                                    | 431      | 0.0                                                                                                                                                                        | -0.9                    | to 0.8 |
|                                                         | 2                                    | 9        | 4.5                                                                                                                                                                        | -0.8                    | to 9.9 |
| <b>Haplotype 7 (TTC)</b>                                | 0                                    | 3873     | 0.8                                                                                                                                                                        | 0.4                     | to 1.2 |
|                                                         | 1                                    | 478      | 0.7                                                                                                                                                                        | -0.2                    | to 1.5 |
|                                                         | 2                                    | 14       | 1.4                                                                                                                                                                        | -1.2                    | to 4.1 |
| <b>Haplotype 8 (TTG)</b>                                | 0                                    | 2057     | 0.6                                                                                                                                                                        | 0.2                     | to 1.1 |
|                                                         | 1                                    | 1895     | 1.1                                                                                                                                                                        | 0.5                     | to 1.6 |
|                                                         | 2                                    | 413      | 0.7                                                                                                                                                                        | -0.2                    | to 1.6 |
| <b>Heme Oxygenase-1 Promoter Repeat Polymorphism</b>    |                                      |          |                                                                                                                                                                            |                         |        |
|                                                         | <i>long allele (&gt;=33 repeats)</i> | <i>N</i> |                                                                                                                                                                            |                         |        |
| <b>HMOX (GT)<sub>n</sub></b>                            | no                                   | 3919     | 0.7 <sup>b</sup>                                                                                                                                                           | 0.3                     | to 1.2 |
|                                                         | yes                                  | 446      | 1.4                                                                                                                                                                        | 0.6                     | to 2.2 |
| <b>Glutathione S-Transferase Polymorphisms</b>          |                                      |          |                                                                                                                                                                            |                         |        |
|                                                         | <i>complete deletion / allele</i>    | <i>N</i> |                                                                                                                                                                            |                         |        |
| <b>GSTM1 deletion<sup>3</sup></b>                       | no                                   | 2032     | 0.8                                                                                                                                                                        | 0.3                     | to 1.3 |
|                                                         | yes                                  | 2319     | 0.8                                                                                                                                                                        | 0.3                     | to 1.3 |
| <b>GSTT1 deletion<sup>3</sup></b>                       | no                                   | 3554     | 0.9                                                                                                                                                                        | 0.5                     | to 1.3 |
|                                                         | yes                                  | 797      | 0.4                                                                                                                                                                        | -0.3                    | to 1.1 |
| <b>GSTP1 Val/Ile Polymorphism</b>                       | Ile / Ile                            | 2061     | 0.9                                                                                                                                                                        | 0.4                     | to 1.3 |
|                                                         | Ile/Val                              | 1892     | 0.5                                                                                                                                                                        | 0.0                     | to 1.1 |
|                                                         | Val/Val                              | 401      | 1.5 <sup>c</sup>                                                                                                                                                           | 0.6                     | to 2.4 |

a  $P_{interaction}=0.038$  under dominant genetic model

b  $P_{interaction}=0.104$

e  $P_{interaction}=0.072$  under recessive genetic model

<sup>1</sup> Positive values represent attenuations of the decline in the product of FEF<sub>25-75</sub> \* FVC compared to a reference group experiencing no air pollution reduction.

<sup>2</sup> Determined from rs2071746, rs735266 and rs5995098 SNPs (in this sequence) using PHASE software v2.1

<sup>3</sup> Deletion means homozygous gene deletion (null vs. non-null)
